# Supplementary material for: A Robust Method to Analyze Copy Number Alterations of Less than 100 kb in Single Cells Using Oligonucleotide Array CGH
Source: PubMed Central journal article supplement (PMC3692546; doi:10.1371/journal.pone.0067031), 2013-06-25
Supplement: pone.0067031.s011.pdf [file pone.0067031.s011.pdf]

**Table S1. Chromosomal location, sequence (according to Knijnenburg *et al.*), primer concentration and product size of the primer pairs used in the multiplex-PCR**

| Gene   | Chromosomal location      | Sequence                                               | Concentration <sup>†</sup> | Product Size | AT/GC content(%) | WGAM fragment size |
|--------|---------------------------|--------------------------------------------------------|----------------------------|--------------|------------------|--------------------|
| LAMC1  | 1:182.992.595-183.114.727 | FWD: tctgcttgggcattctct<br>REV: ttctaacagggtgggggatg   | 0.2 µM                     | 111 bp       | 57.6/42.3        | 171 bp             |
| CADPS* | 3:62.384.021-62.861.064   | FWD: cccacccttcttcaactaca<br>REV: gtgtgcacataccaccgaag | 0.08 µM                    | 175 bp       | 51.4/40.5        | 717 bp             |
| GRIK5  | 19:42.502.73-42.569.9957  | FWD: ctagtctccaccaacctcag<br>REV: ctcgatgatcccgttgatct | 0.1 µM                     | 232 bp       | 39.2/60.7        | 2520 bp            |
| NEK9   | 14:75.548.818-75.593.778  | FWD: gcaggaggaacctgtatga<br>REV: caggaaagaaagcccacaga  | 0.1 µM                     | 288 bp       | 60.4/39.5        | 490 bp             |
| PICK1  | 22:38.453.262-38.471.708  | FWD: tcgtatgctggagtctctgtg<br>REV: gggatggcttggtaggta  | 0.08 µM                    | 358 bp       | 41.3/58.6        | 1111 bp            |
| DNAH9  | 17:11.501.748-11.873.065  | FWD: gggctcatcaccagcattt<br>REV: gccatctccacatggtctt   | 0.08 µM                    | 401 bp       | 45.1/54.8        | 625 bp             |

\*MseI restriction digestion site (5' T<sup>^</sup>TAA3') in PCR product might prohibit successful amplification of this locus in WGAM products.

<sup>†</sup>final concentration of forward and reverse primer in multiplex-PCR reaction.
