# Supplementary material for: A Robust Method to Analyze Copy Number Alterations of Less than 100 kb in Single Cells Using Oligonucleotide Array CGH
Source: PubMed Central journal article supplement (PMC3692546; doi:10.1371/journal.pone.0067031), 2013-06-25
Supplement: pone.0067031.s013.pdf [file pone.0067031.s013.pdf]

**Table S3. Comparison of theoretical resolution and size of detected alterations in whole genome amplified single cell aCGH experiments**

| WGA method                                             | Analysis method                                | Theoretical resolution | Detected Aberration <sup>+</sup> | Reference                          |
|--------------------------------------------------------|------------------------------------------------|------------------------|----------------------------------|------------------------------------|
| GenomiPhi DNA Amplification Kit                        | 4k BAC array                                   | ~820 kb <sup>*</sup>   | 34.0 Mb                          | Le Caignec <i>et al.</i> 2006 [43] |
| GenomePlex® Single Cell Whole Genome Amplification Kit | 32k full-tiling BAC array                      | tiling                 | 8.3 Mb                           | Fiegler <i>et al.</i> 2007 [34]    |
| Adapter-linker-/MSE-PCR                                | 3k BAC array                                   | 1 Mb <sup>§</sup>      | 4.4-5.0 Mb                       | Fuhrmann <i>et al.</i> 2008 [20]   |
| GenomePlex® Single Cell Whole Genome Amplification Kit | 2.1M whole Genome tiling array (NimbleGen)     | ~5 kb <sup>*</sup>     | 2.6-3.0 Mb                       | Geigl <i>et al.</i> 2009 [35]      |
| GenomiPhi DNA Amplification Kit                        | 244k oligonucleotide array (Agilent)           | 9 kb <sup>*</sup>      | n.s.                             | Cheng <i>et al.</i> 2011 [26]      |
| GenomePlex® Single Cell Whole Genome Amplification Kit | 244k oligonucleotide array (Agilent)           | 9 kb <sup>*</sup>      | 2.0-3.0 Mb                       | Mathiesen <i>et al.</i> 2011 [44]  |
| GenomePlex® Single Cell Whole Genome Amplification Kit | 1 Mb BAC/PAC array                             | 1 Mb <sup>§</sup>      | 3.3 Mb                           | Hjortland <i>et al.</i> 2011 [45]  |
| PicoPlex single cell WGA kit                           | 44k oligonucleotide array (Agilent)            | 43 kb <sup>*</sup>     | 1.2 Mb                           | Bi <i>et al.</i> 2012 [32]         |
| GenomiPhi DNA Amplification Kit                        | 3k BAC array (BluGnome)                        | 1 Mb <sup>§</sup>      | n.s.                             | Konings <i>et al.</i> 2012 [46]    |
| GenomePlex® Single Cell Whole Genome Amplification Kit | NGS - massively parallel sequencing (Illumina) | 54 kb <sup>§</sup>     | n.s.                             | Navin <i>et al.</i> 2011 [38]      |

<sup>\*</sup>according to manufacturer`s information or <sup>§</sup>author`s information (resolution might be lower due to certain analytical algorithms used in the experiments), <sup>+</sup>as described in the publication, n.s. = not specified.
