# Supplementary material for: A Robust Method to Analyze Copy Number Alterations of Less than 100 kb in Single Cells Using Oligonucleotide Array CGH
Source: PubMed Central journal article supplement (PMC3692546; doi:10.1371/journal.pone.0067031), 2013-06-25
Supplement: pone.0067031.s014.pdf [file pone.0067031.s014.pdf]

### **Method S1. Cell culture**

The B-cell precursor leukemia cell line REH (DSMZ, no. ACC-22) and the esophageal adenocarcinoma cell line OE19 (DSMZ, no. ACC-700) were cultured in RPMI 1640 + Glutamax™-I supplemented with 10% fetal calf serum (FCS, both Gibco®/Life Technologies™). Cells were maintained at 37°C and 5% CO<sub>2</sub>.
