# Supplementary material for: A Robust Method to Analyze Copy Number Alterations of Less than 100 kb in Single Cells Using Oligonucleotide Array CGH
Source: PubMed Central journal article supplement (PMC3692546; doi:10.1371/journal.pone.0067031), 2013-06-25
Supplement: pone.0067031.s015.pdf [file pone.0067031.s015.pdf]

## **Method S2. DNA Preparation**

Genomic DNA (gDNA) from REH, OE19, a female (BM) and a male (NHS) healthy control (hc) were prepared using the QIAamp DNA Blood Midi Kit (Qiagen) according to the manufacturer`s protocol. DNA quality was monitored on a 1.5% agarose gel and DNA concentration was determined using Infinite<sup>®</sup> 200 PRO NanoQuant spectrometer (Tecan Group Ltd.).
