# Supplementary material for: A Robust Method to Analyze Copy Number Alterations of Less than 100 kb in Single Cells Using Oligonucleotide Array CGH
Source: PubMed Central journal article supplement (PMC3692546; doi:10.1371/journal.pone.0067031), 2013-06-25
Supplement: pone.0067031.s018.pdf [file pone.0067031.s018.pdf]

**Method S5. Whole genome amplification of single cell DNA using the Single Cell WGA Kit (WGAN, New England Biolabs, E2620S/L)**

Isolation of single cells :

- Coat the bottom of a petri dish with FCS, dilute cell suspensions with 1x PBS to achieve a density of one cell per visual field under an inverse microscope with 100x magnification
- Use 1  $\mu$ l pipette to isolate a single cell
- Transfer single cell into 4  $\mu$ l Cell Extraction Buffer

Whole genome amplification:

- Add 5  $\mu$ l Extraction Cocktail to each cell and incubate for 10 min at 75°C and 4 min at 95°C in a thermal cycler
- Transfer cells on ice and add 5  $\mu$ l Pre-Amp Cocktail to each cell
- Pre-amplification is performed with the following thermal cycler program:

95°C for 2 min  
95°C for 15 sec  
15°C for 50 sec  
25°C for 40 sec  
35°C for 30 sec  
65°C for 40 sec  
75°C for 40 sec } 12 x

- Place samples on ice
- Add 60  $\mu$ l Amplification Cocktail to the 15  $\mu$ l pre-amplification product
- Amplification is performed with the following thermal cycler program:

95°C for 2 min  
95°C for 15 sec  
65°C for 1 min  
75°C for 1 min } 14 x

- Store PCR products at -20°C
