# Supplementary material for: A Robust Method to Analyze Copy Number Alterations of Less than 100 kb in Single Cells Using Oligonucleotide Array CGH
Source: PubMed Central journal article supplement (PMC3692546; doi:10.1371/journal.pone.0067031), 2013-06-25
Supplement: pone.0067031.s019.pdf [file pone.0067031.s019.pdf]

**Method S6. Whole genome amplification of single cell DNA using Single Cell WGA Kit (WGAS, Sigma-Aldrich<sup>®</sup>, WGA4)**

Isolation of single cells and Proteinase K digestion :

- Coat the bottom of a petri dish with FCS, dilute cell suspensions with 1x PBS to achieve a density of one cell per visual field under an inverse microscope with 100x magnification
- Use 1  $\mu$ l pipette to isolate a single cell
- Transfer single cell into 8  $\mu$ l dH<sub>2</sub>O
- Add 1  $\mu$ l Proteinase K Solution in Single Cell Lysis & Fragmentation Buffer to each single cell
- Incubate samples for 1 h at 50°C and 99°C for 4 min
- Place samples on ice

Whole genome amplification:

- Add 2  $\mu$ l 1x Single Cell Library Preparation Buffer
- Add 1  $\mu$ l Library Stabilization Buffer
- Incubate samples for 2 min at 95°C in a thermal cycler.
- Cool samples on ice and add 1  $\mu$ l Library Preparation Enzyme to each cell
- Preamplification is performed with the following thermal cycler program:

16°C for 20 min  
24°C for 20 min  
37°C for 20 min  
75°C for 5 min

- Add 61  $\mu$ l Amplification Master Mix (10x Amplification Master Mix, Nuclease-Free Water and WGA DNA Polymerase) to each sample
- Amplification is performed with the following thermal cycler program:

95°C for 3 min  
94°C for 30 sec } 25 x  
65°C for 5 min

- Store amplified DNA at -20°C
