# Supplementary material for: A Robust Method to Analyze Copy Number Alterations of Less than 100 kb in Single Cells Using Oligonucleotide Array CGH
Source: PubMed Central journal article supplement (PMC3692546; doi:10.1371/journal.pone.0067031), 2013-06-25
Supplement: pone.0067031.s021.pdf [file pone.0067031.s021.pdf]

### **Method S8. CellSearch<sup>®</sup> System identification, MoFlo<sup>™</sup> XDP isolation and WGAM amplification of single tumor cells**

For the preparation of a surrogate CTC sample we spiked cells from the EpCAM<sup>+</sup> cell line OE19 in 7.5 ml peripheral blood from a healthy donor. The sample was retained at room temperature for 72 h in a CellSave Preservative Tube (Veridex LLC.). The spiked EpCAM-positive OE19 cells were captured, identified and enumerated using the CellSearch<sup>®</sup> Epithelial Cell Kit on the CellSearch<sup>®</sup> System (Veridex LLC.) according to the manufacturer's protocol. The whole content of the CellSearch<sup>®</sup> cartridge was transferred into a FACS tube and single cells were sorted into a 96-well plate using fluorescence activated cell sorting (FACS) with the MoFlo<sup>™</sup> XDP cell sorter (Beckman Coulter). Each well contained 5  $\mu$ l of Proteinase K digestion mix (0.5  $\mu$ l OPA, 0.13  $\mu$ l 10% Tween, 0.13  $\mu$ l 10% Igepal, 0.26  $\mu$ l 10 mg/ml Proteinase K and 3.8  $\mu$ l dH<sub>2</sub>O). Digestion was performed for 10 h at 42°C and Proteinase K was inactivated at 80°C for 10 min. 2  $\mu$ l MseI-digestion master mix (1  $\mu$ l MseI, 1  $\mu$ l OPA) were added to each cell and digestion was performed for 3 h at 37°C. Enzyme was inactivated at 65°C for 5 min. Preannealing of adapters, ligation and primary PCR was performed as described in Method S3. For aCGH hybridization we randomly chosen two single cells of 81 (86.2%) successfully amplified single cells.
