# Supplementary material for: A Robust Method to Analyze Copy Number Alterations of Less than 100 kb in Single Cells Using Oligonucleotide Array CGH
Source: PLOS journal article supplement (doi:10.1371/journal.pone.0067031), 2013-06-25
Supplement: S22 (10.1371/journal.pone.0067031.s022) [file journal.pone.0067031.s022]

### **Method S9. Qualitative and quantitative control of whole genome amplified DNA**

Quality control of the WGA-DNA was performed by amplification of specific loci in a multiplex-PCR reaction as basically described by Knijnenburg *et al.* [29], (Supplementary Table S1). Essentially six randomly chosen loci from six different chromosomes were checked for successful amplification to gain information of the overall representation of the WGA products. A mastermix was prepared consisting of 5 µl Dream Taq™ Green PCR Master Mix (2X, Fermentas), 1 µl 10X Primer Mix (Supplementary Table S1) and 3.7 µl dH<sub>2</sub>O. 0.3 µl template DNA were added to each reaction and reaction was performed as follows: 95°C for 2 min. 95°C for 30 sec, 60°C for 40 sec, 72°C for 1 min (33 cycles). 72°C for 5 min. PCR products were analyzed on a 1.5% agarose gel. The concentration and yield of the amplified DNA was determined using the Infinite® 200 PRO NanoQuant spectrometer after cleanup of the WGA products with Amicon Ultra-0.5, Ultracel-30 Membrane purification columns (Merck Millipore).
